# Supplementary material for: Wisteria Vein Mosaic Virus Detected for the First Time in Iran from an Unknown Host by Analysis of Aphid Vectors
Source: PubMed Central journal article supplement — Plant Pathol J. 2020 Feb 1;36(1):87–97. doi: 10.5423/PPJ.OA.10.2019.0268 (PMC7012578; doi:10.5423/ppj.oa.10.2019.0268), 2020-02-01
Supplement: PPJ-36-087_Supple.pdf [file PPJ-36-087_Supple.pdf]

**Supplementary Table 1.** List of virus species used in the construction of potyvirus phylogenetic trees

| Virus                               | Abbreviation | Accession No. |
|-------------------------------------|--------------|---------------|
| Algerian watermelon mosaic virus    | AWMV         | NC_010736     |
| Apium virus Y                       | ApVY         | NC_014905     |
| Arracacha mottle virus              | AMoV         | NC_018176     |
| Banana bract mosaic virus           | BBrMV        | NC_009745     |
| Basella rugose mosaic virus         | BaRMV        | DQ851494      |
| Bean common mosaic virus            | BCMV         | U34972        |
| Bean common mosaic necrosis virus   | BCMNV        | NC_004047     |
| Bean yellow mosaic virus            | BYMV         | NC_003492     |
| Beet mosaic virus                   | BtMV         | NC_005304     |
| Bidens mosaic virus                 | BiMV         | NC_023014     |
| Bidens mottle virus                 | BiMoV        | NC_014325     |
| Brugmansia mosaic virus             | BruMV        | NC_020105     |
| Brugmansia suaveolens mottle virus  | BsMoV        | NC_014536     |
| Celery mosaic virus                 | CeMV         | NC_015393     |
| Calla lily latent virus             | CLLV         | NC_021196     |
| Canna yellow streak virus           | CaYSV        | NC_013261     |
| Chilli ringspot virus               | CRSV         | NC_016044     |
| Clover yellow vein virus            | CIYVV        | NC_003536     |
| Colombian datura virus              | CDV          | NC_020072     |
| Cyrtanthus elatus virus A           | CEVA         | NC_017977     |
| Daphne mosaic virus                 | DapMV        | NC_008028     |
| Dasheen mosaic virus                | DsMV         | NC_003537     |
| East Asian Passiflora virus         | EAPV         | NC_007728     |
| Freesia mosaic virus                | FreMV        | NC_014064     |
| Gloriosa stripe mosaic virus        | GSMV         | EF427894      |
| Hardenbergia mosaic virus           | HarMV        | NC_015394     |
| Hippeastrum mosaic virus            | HiMV         | NC_017967     |
| Johnsongrass mosaic virus           | JGMV         | NC_003606     |
| Leek yellow stripe virus            | LYSV         | NC_004011     |
| Lettuce mosaic virus                | LMV          | NC_003605     |
| Lily mottle virus                   | LMoV         | NC_005288     |
| Maize dwarf mosaic virus            | MDMV         | NC_003377     |
| Moroccan watermelon mosaic virus    | MWMV         | NC_009995     |
| Narcissus degeneration virus        | NDV          | NC_008824     |
| Narcissus late season yellows virus | NLSYV        | NC_023628     |
| Narcissus yellow stripe virus       | NYSV         | NC_011541     |
| Onion yellow dwarf virus            | OYDV         | AJ510223      |
| Ornithogalum mosaic virus           | OrMV         | NC_019409     |
| Panax virus Y                       | PanVY        | NC_014252     |
| Papaya leaf distortion mosaic virus | PLDMV        | NC_005028     |
| Papaya ringspot virus               | PRSV         | NC_001785     |
| Passion fruit woodiness virus       | PWV          | NC_014790     |
| Pea seed-borne mosaic virus         | PSbMV        | NC_001671     |
| Peanut mottle virus                 | PeMoV        | NC_002600     |
| Pennisetum mosaic virus             | PenMV        | NC_007147     |
| Pepper mottle virus                 | PepMoV       | NC_001517     |
| Pepper yellow mosaic virus          | PepYMV       | NC_014327     |

|                                         |       |                    |
|-----------------------------------------|-------|--------------------|
| Pepper veinal mottle virus              | PVMV  | NC_011918          |
| Peru tomato mosaic virus                | PTV   | NC_004573          |
| Plum pox virus                          | PPV   | AJ243957           |
| Potato virus A                          | PVA   | NC_004039          |
| Potato virus Y                          | PVY   | AJ889867           |
| Potato virus V                          | PVV   | NC_004010          |
| Ryegrass mosaic virus                   | RGMV  | NC_001814          |
| Scallion mosaic virus                   | ScaMV | NC_003399          |
| Shallot yellow stripe virus             | SYSV  | NC_007433          |
| Soybean mosaic virus                    | SMV   | NC_002634          |
| Sugarcane mosaic virus                  | SCMV  | NC_003398          |
| Sunflower chlorotic mottle virus        | SCMoV | NC_014038          |
| Sweet potato feathery mottle virus      | SPFMV | D86371             |
| Sweet potato virus 2                    | SPV2  | NC_017970          |
| Tamarillo leaf malformation virus       | TLMV  | NC_026615          |
| Telosma mosaic virus                    | TelMV | NC_009742          |
| Thunberg fritillary mosaic virus        | TFMV  | NC_007180          |
| Tobacco etch virus                      | TEV   | NC_001555          |
| Tobacco vein banding mosaic virus       | TVBMV | NC_009994          |
| Tomato necrotic stunt virus             | TNSV  | NC_017824          |
| Turnip mosaic virus                     | TuMV  | NC_002509          |
| Vanilla distortion mosaic virus         | VDMV  | NC_025250          |
| Watermelon mosaic virus                 | WMV   | NC_006262          |
| Wild tomato mosaic virus                | WTMV  | NC_009744          |
| Wisteria vein mosaic virus              | WVMV  | NC_007216          |
| Wisteria vein mosaic virus <sup>a</sup> | WVMV  | MH558668, MH558669 |
| Yam mosaic virus                        | YMV   | NC_004752          |
| Yambean mosaic virus                    | YBMV  | NC_016441          |
| Zantedeschia mild mosaic virus          | ZaMMV | NC_011560          |
| Zea mosaic virus                        | ZeMV  | NC_018833          |
| Zucchini shoestring virus               | ZSV   | KU355553           |
| Zucchini tigre mosaic virus             | ZTMV  | NC_023175          |
| Zucchini yellow mosaic virus            | ZYMV  | NC_003224          |

<sup>a</sup>The sequence of this virus isolate was obtained in this study.

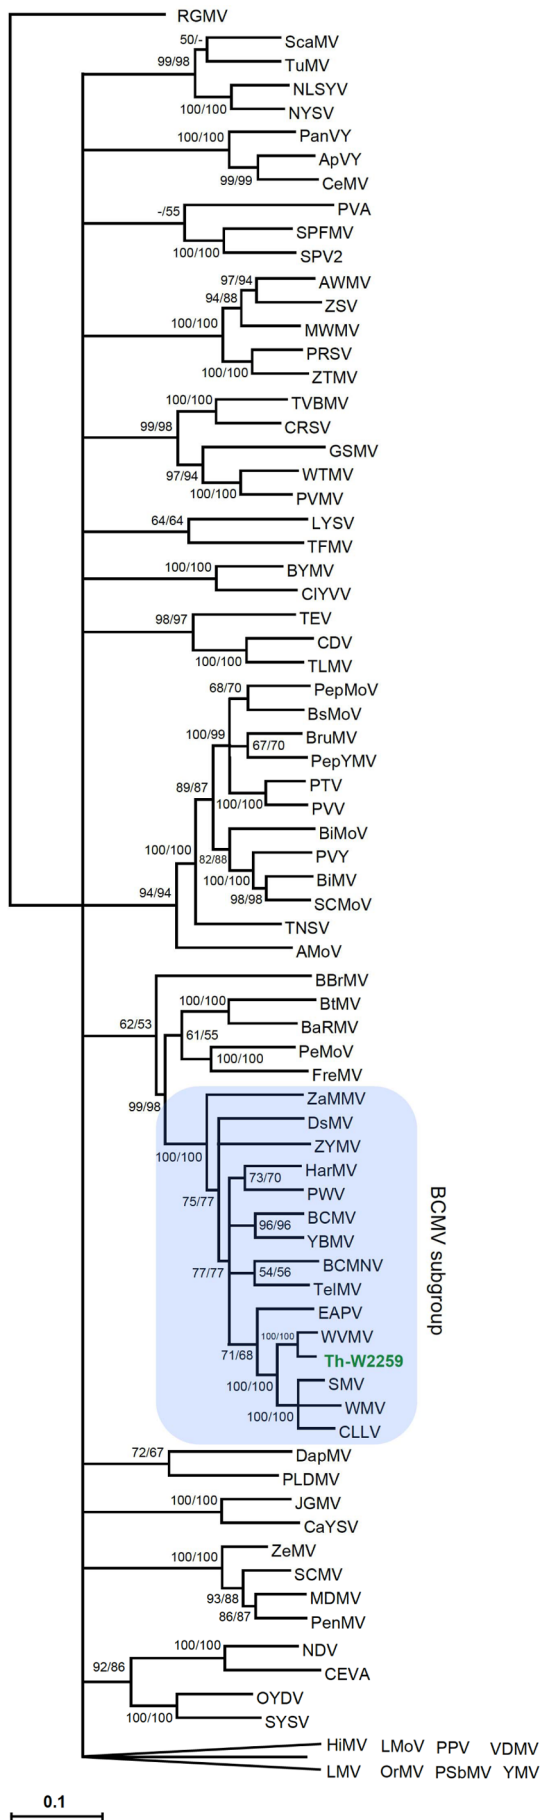

**Supplementary Fig. 1.** A maximum likelihood (ML) tree constructed from the concatenated nucleotide sequence of the Iranian Wisteria vein mosaic virus isolate Th-W2259 and the corresponding regions of 78 representative *Potyvirus* species. Numbers at each node indicate the percentage of supporting bootstrap samples in ML and neighbor-joining methods, respectively. The homologous sequence of an isolate of ryegrass mosaic virus (genus *Rymovirus*) was used as the outgroup.
